# Supplementary material for: Trajectories of Physical Activity Predict the Onset of Depressive Symptoms but Not Their Progression: A Prospective Cohort Study
Source: J Sports Med (Hindawi Publ Corp). 2016 Oct 4;2016:8947375. doi: 10.1155/2016/8947375 (PMC5067320; doi:10.1155/2016/8947375)
Supplement: Supplementary file 1 — The Supplementary Material consists of six tables.Supplementary Tables 1-3 present the descriptives of the data. Supplementary Table 4 presents the parameter estimates of the physical activity trajectory groups. Supplementary Tables 5-6 present the regression analyses between physical activity and symptoms of depression. [file 8947375.f1.doc]

**Supplementary Table 1:** Descriptive statistics of the full sample(*n =* 648) *.

| Variables |  | Measurement  year | Mean± *SD*/  *n* (%) | Range |
| --- | --- | --- | --- | --- |
| Covariates | Age | 1980 | 10.47±4.97 | 3-18 |
|  | Childhood negative emotionality | 1980 | 1.04±0.10 | 1-2 |
|  | Parental education† | 1980 | 2.01±0.76 | 1-3 |
|  | Parental income | 1980 | 5.01±1.86 | 1-8 |
|  | Symptoms of depression | 1992 | 2.13±0.57 | 1-4.14 |
|  | Symptoms of depression | 1997 | 2.09±0.64 | 1-4.33 |
|  | Symptoms of depression | 2001 | 2.01±0.63 | 1-4.29 |
|  | Symptoms of depression | 2007 | 2.02±0.66 | 1-4.29 |
|  | Participants’ education‡ | 2007 | 2.21±0.87 | 1-3 |
|  | Participants’ income | 2007 | 3.55±1.39 | 1-8 |
|  | Social support | 2007 | 4.21±0.77 | 1.08-5.00 |
|  | Body mass index | 2007 | 25.61±4.52 | 16.56-45.89 |
|  | Smoking status | 2007 | 4.05±1.37 | 1-5 |
| Physical activity trajectory groups |  |  |  |  |
|  | Lightly physically active | 1980-2011 | 72 (11.1) |  |
|  | Moderately physically active | 1980-2011 | 536 (82.7) |  |
|  | Highly physically active | 1980-2011 | 40 (6.2) |  |
| Dependent variable | Symptoms of depression (BDI-II) | 2012 | 4.69±6.32 | 0-58 |

*648 Participants provided information regarding each study variable, and 413 (63.7%) were females and 235 (36.3%) were males.

†Frequencies of parents’ educational levels were as follows: low, *n* = 182 (28.1%), average, *n* = 274 (42.3%), high, *n* = 192 (29.6%).

‡Frequencies of participants’ educational status were as follows: low, *n* = 190 (29.3%), average, *n* = 129 (19.9%), high, *n* = 329

(50.8%).

**Supplementary Table 2:** Descriptive statistics of the imputed sample (for physical activity trajectory

groups, *n* = 3564,for other variables *n =* 3596).

| Variables |  | Measurement  year | Mean± *SD*/  *n* (%) | Range |
| --- | --- | --- | --- | --- |
| Covariates | Age | 1980 | 10.44±4.99 | 3-18 |
|  | Childhood negative emotionality | 1980 | 1.06±0.11 | 1-2 |
|  | Parental education | 1980 | 1.90±0.76 | 0.82-3 |
|  | Parental income | 1980 | 4.78±1.91 | 1-8 |
|  | Symptoms of depression | 1992 | 2.16±0.52 | 1-4.57 |
|  | Symptoms of depression | 1997 | 2.14±0.56 | 1-4.57 |
|  | Symptoms of depression | 2001 | 2.08±0.57 | 1-4.62 |
|  | Symptoms of depression | 2007 | 2.07±0.57 | 1-4.67 |
|  | Participants’ education | 2007 | 2.06±0.71 | 1-3 |
|  | Participants’ income | 2007 | 3.45±1.25 | 1-8 |
|  | Social support | 2007 | 4.14±0.62 | 1.08-5.00 |
|  | Body mass index | 2007 | 26.03±3.75 | 16.56-58.82 |
|  | Smoking status | 2007 | 3.79±1.22 | 1-5 |
|  |  |  |  |  |
| Physical activity trajectory groups |  |  |  |  |
|  | Lightly physically active | 1980-2011 | 371 (10.4) |  |
|  | Moderately physically active | 1980-2011 | 3046 (85.5) |  |
|  | Highly physically active | 1980-2011 | 147 (4.1) |  |
| Dependent variable | Symptoms of depression (BDI-II) | 2012 | 5.12±5.04 | -1.95-58 |

**Supplementary Table 3:** Descriptive statistics of the physical

activity factor scores by age ( *n* = 537-3027) *.

| Participants’  age | |  | | |
| --- | --- | --- | --- | --- |
|  | *n* | | Mean ± *SD* | Range |
| 9 | 1775 | | 0.23±0.45 | -1.27 to 1.67 |
| 12 | 2426 | | 0.23±0.51 | -1.61 to 1.83 |
| 15 | 3027 | | 0.09±0.58 | -1.79 to 1.95 |
| 18 | 3007 | | -0.05±0.59 | -1.63 to 2.04 |
| 21 | 2435 | | -0.10±0.58 | -1.73 to 1.91 |
| 24 | 2346 | | -0.06±0.59 | -1.76 to 1.96 |
| 27 | 1710 | | -0.08±0.57 | -1.84 to 1.86 |
| 30 | 1740 | | -0.03±0.59 | -2.00 to 1.66 |
| 33 | 1223 | | -0.02±0.54 | -1.76 to 2.08 |
| 34 | 557 | | 0.09±0.56 | -1.74 to 1.50 |
| 36 | 1247 | | -0.06±0.55 | -1.90 to 1.75 |
| 37 | 572 | | 0.00±0.55 | -1.76 to 2.00 |
| 39 | 1188 | | -0.09±0.56 | -1.87 to 1.53 |
| 40 | 646 | | -0.01±0.57 | -1.89 to 1.58 |
| 42 | 601 | | -0.08±0.57 | -1.92 to 1.87 |
| 43 | 651 | | -0.07±0.57 | -1.91 to 1.71 |
| 45 | 537 | | -0.09±0.60 | -1.88 to 2.25 |
| 46 | 601 | | -0.07±0.56 | -1.91 to 1.78 |
| 49 | 537 | | -0.08±0.61 | -1.96 to 2.13 |

*In 1980, participants were aged 9-18; in 1983, 9-21; in 1986, 9-24; in 1989,

12-27; in 1992, 15-30; in 2001, 24-39; in 2007, 30-45; and in 2011, 34-49.

**Supplementary Table 4:** Parameter estimates for the physical activity trajectory groups(*n* = 3564).

|  | Lightly physically active group | | Moderately physically active group | | Highly physically  active group | |
| --- | --- | --- | --- | --- | --- | --- |
|  | *β (SE)* | *p* | *β (SE)* | *p* | *β (SE)* | *p* |
| Intercept | -0.63 (0.05) | <0.001 | 0.03 (0.02) | 0.285 | 0.71 (0.07) | <0.001 |
| Linear* | -0.01 (0.001) | <0.001 | -0.00 (0.00) | < 0.001 | -0.00 (0.00) | <0.001 |

*The coefficient *β* represents the amount of increase or decrease in the dependent variable (physical activity) as the independent

variable (time) increases one unit.

**Supplementary Table 5:** Physical activity trajectory groups as predictors of depressive symptoms (2012) in the original (*n* = 1325-1722) and imputed (*n* = 3564)

samplescontrolling for each covariate separately in the models.

| Independent variable | Covariate | Measurement  year | Original sample* | Imputed sample† |
| --- | --- | --- | --- | --- |
| Physical activity trajectory groups | Age | 1980 | *F*(2,1718=7.80, *p*<0.001), *R2***=**0.01 | *F*(2,3560=15.39, *p*<0.001), *R2*=0.01 |
|  | Sex | 1980 | *F*(2,1718=7.56, *p*=0.001), *R2*=0.01 | *F*(2,3560=15.56, *p*<0.001), *R2*=0.01 |
|  | Childhood negative emotionality | 1980 | *F*(2,1536=6.67, *p*=0.001), *R2*=0.01 | *F*(2,3560=16.18, *p*<0.001), *R2*=0.01 |
|  | Parental education | 1980 | *F*(2,1692=6.33, *p*=0.002), *R2*=0.01 | *F*(2,3560=15.60, *p*<0.001), *R2*=0.01 |
|  | Parental income | 1980 | *F*(2,1664=5.56, *p*=0.004), *R2*=0.01 | *F*(2,3560=14.29, *p*<0.001), *R2*=0.02 |
|  | Symptoms of depression | 1992 | *F*(2,1334=2.44, *p*=0.088), *R2*=0.13 | *F*(2,3560=4.70, *p*=0.009), *R2*=0.23 |
|  | Symptoms of depression | 1997 | *F*(2,1336=2.33, *p*=0.098), *R2*=0.17 | *F*(2,3560=1.98, *p*=0.139), *R2*=0.29 |
|  | Symptoms of depression | 2001 | *F*(2,1403=1.06, *p*=0.347), *R2*=0.21 | *F*(2,3560=0.64, *p*=0.528), *R2*=0.34 |
|  | Symptoms of depression | 2007 | *F*(2,1476=1.62, *p*=0.197), *R2*=0.31 | *F*(2,3560=3.46, *p*=0.032), *R2*=0.44 |
|  | Participants’ education | 2007 | *F*(2,1321=5.33, *p*=0.005), *R2*=0.01 | *F*(2,3560=10.54, *p*<0.001), *R2*=0.02 |
|  | Participants’ income | 2007 | *F*(2,1405=4.03, *p*=0.018), *R2*=0.02 | *F*(2,3560=10.78, *p*<0.001), *R2*=0.05 |
|  | Social support | 2007 | *F*(2,1476=4.78, *p*=0.009), *R2*=0.07 | *F*(2,3560=9.88, *p*<0.001), *R2*=0.11 |
|  | Body mass index | 2007 | *F*(2,1405=5.91, *p*=0.003), *R2*=0.03 | *F*(2,3560=13.90, *p*<0.001), *R2*=0.04 |
|  | Smoking status | 2007 | *F*(2,1447=5.63, *p*=0.004), *R2*=0.01 | *F*(2,3560=14.00, *p*<0.001), *R2*=0.01 |

*In the original sample, previous symptoms of depression (1992-2007) attenuated all the associations between physical activity groups and depressive symptoms (2012).

†In the imputed sample, previous symptoms of depression (1997 and 2001) attenuated all the associations between physical activity groups and depressive symptoms (2012).

**Supplementary Table 6:** Adulthood physical activity (assessed in 2007, participants’ aged 30-45) as a predictor of depressive symptoms (2012) in the original

(*n* = 1325-1722) and imputed (*n* = 3564) samplescontrolling for each covariate separately in the models.

| Independent variable | Covariate | Measurement  year | Original sample* | Imputed sample† |
| --- | --- | --- | --- | --- |
| Physical activity (2007) | Age | 1980 | *b*=-1.09, *p*<0.001, *R2***=**0.01 | *b*=-1.04, *p*<0.001, *R2*=0.02 |
|  | Sex | 1980 | *b*=-1.10, *p*<0.001, *R2*=0.02 | *b*=-1.06, *p*<0.001, *R2*=0.02 |
|  | Childhood negative emotionality | 1980 | *b*=-1.22, *p*<0.001, *R2*=0.02 | *b*=-1.05, *p*<0.001 *R2*=0.02 |
|  | Parental education | 1980 | *b*=-1.02, *p*<0.001, *R2*=0.01 | *b*=-1.04, *p*<0.001, *R2*=0.02 |
|  | Parental income | 1980 | *b*=-0.95, *p*<0.001, *R2*=0.01 | *b*=-1.00, *p*<0.001, *R2*=0.02 |
|  | Symptoms of depression | 1992 | *b*=-0.70, *p*=0.009, *R2*=0.13 | *b*=-0.60, *p*<0.001, *R2*=0.23 |
|  | Symptoms of depression | 1997 | *b*=-0.60, *p*=0.024, *R2*=0.18 | *b*=-0.46, *p<*0.001, *R2*=0.29 |
|  | Symptoms of depression | 2001 | *b*=-0.34, *p*=0.156, *R2*=0.21 | *b*=-0.21, *p*=0.080, *R2*=0.34 |
|  | Symptoms of depression | 2007 | *b*=-0.18, *p*=0.434, *R2*=0.30 | *b*=-0.14, *p*=0.222, *R2*=0.44 |
|  | Participants’ education | 2007 | *b*=-0.97, p<0.001, *R2*=0.01 | *b*=-0.86, *p*<0.001, *R2*=0.03 |
|  | Participants’ income | 2007 | *b*=-0.79, *p*=0.002, *R2*=0.02 | *b*=-0.88, *p*<0.001, *R2*=0.05 |
|  | Social support | 2007 | *b*=-0.85, *p*=0.001, *R2*=0.07 | *b*=-0.68, *p*<0.001, *R2*=0.11 |
|  | Body mass index | 2007 | *b*=-0.85, *p*=0.001, *R2*=0.03 | *b*=-0.89, *p*<0.001, *R2*=0.04 |
|  | Smoking status | 2007 | *b*=-0.89, *p*=0.001, *R2*=0.01 | *b*=-0.98, *p*<0.001, *R2*=0.02 |

*In the original sample, previous symptoms of depression (2001-2007) attenuated all the associations between physical activity groups and depressive symptoms (2012).

†In the imputed sample, previous symptoms of depression (2001-2007) attenuated all the associations between physical activity groups and depressive symptoms (2012).
